# Supplementary material for: Coupled electrokinetic and biological remediation method leads to improved treatment of chlorinated solvents at high sulfate, transport limited sites
Source: Royal Society of Chemistry journal article supplement (doi:10.1039/d0ew00486c), 2020-01-01
Supplement: d0ew00486c1.pdf [file d0ew00486c1.pdf]

## Supplementary Information

### Electroosmotic Flow Rate

$$\text{Equation 1}^1 \quad Q_e = K_e E$$

$$\text{Equation 2}^1 \quad K_e = \frac{\eta \epsilon_w \zeta}{\mu}$$

**Table S1.** Variable names, units, and values used to calculate expected rate of electroosmosis.

| Variable     | Variable Name and Units                          | Value                 | Reference |
|--------------|--------------------------------------------------|-----------------------|-----------|
| $Q_e$        | electroosmotic flow rate ( $\text{m s}^{-1}$ )   | --                    | --        |
| $K_e$        | coefficient of electroosmotic permeability       | --                    | --        |
| $E$          | electric field intensity ( $\text{V m}^{-1}$ )   | 75                    | --        |
| $\eta$       | soil porosity                                    | 0.55                  | 2         |
| $\epsilon_w$ | permittivity of pore water ( $\text{F m}^{-1}$ ) | $7.1 \times 10^{-10}$ |           |
| $\mu$        | viscosity of pore water ( $\text{Ns m}^{-1}$ )   | 0.001002              | 3         |
| $\zeta$      | zeta potential (V)                               | -0.010                | 4         |

### Effective Ionic Mobility

$$\text{Equation 3}^5 \quad U_j = \frac{D_j z_j F}{RT} \tau \eta$$

**Table S2.** Variable names, units, and values used to calculate expected rate of electromigration.

| Variable | Variable Name and Units                                               | Value                            | Reference |
|----------|-----------------------------------------------------------------------|----------------------------------|-----------|
| $U_j$    | effective ionic mobility ( $\text{m}^2 \text{s}^{-1} \text{V}^{-1}$ ) | --                               | --        |
| $D_j$    | species specific diffusion coefficient ( $\text{m}^2 \text{s}^{-1}$ ) | $1.070 \times 10^{-9}$ (sulfate) | --        |
| $z_j$    | chemical species charge                                               | 2 (sulfate)                      | --        |
| $F$      | Faraday's constant ( $\text{C mol}^{-1}$ )                            | 96485.34                         | --        |
| $\tau$   | tortuosity                                                            | 0.35                             | 1         |
| $\eta$   | porosity                                                              | 0.55                             | 2         |
| $R$      | gas constant ( $\text{J mol}^{-1} \text{K}^{-1}$ )                    | 8.314                            | --        |
| $T$      | temperature (K)                                                       | 298                              | --        |

## References

- 1 R. T. Gill, S. F. Thornton, M. J. Harbottle and J. W. N. Smith, Electrokinetic Migration of Nitrate Through Heterogeneous Granular Porous Media, *Groundw. Monit. Remediat.*, 2015, **35**, 46–56.
- 2 H. Sharma and K. R. Reddy, *Geoenvironmental Engineering: Site Remediation, Waste Containment and Emerging Waste Management Technologies*, 2004.
- 3 W. Kestin, J., Sokolov, M., Wakeham, Viscosity of Liquid Water in the -8C to 150C Range, *J. Phys. Chem. Ref. Data*, 1978, **7**, 941–948.
- 4 H. A. Aziz, H. A. Tajarudin, T. H. L. Wei and M. Y. D. Alazaiza, Iron and manganese removal from groundwater using limestone filter with iron-oxidized bacteria, *Int. J. Environ. Sci. Technol.*, 2020, **17**, 2667–2680.
- 5 E. Mohamedelhassan and J. Q. Shang, Electrokinetics-generated pore fluid and ionic transport in an offshore calcareous soil, *Can. Geotech. J.*, 2003, **40**, 1185–1199.
